# Supplementary material for: The Retinol Binding Protein Receptor 2 (Rbpr2) is required for Photoreceptor Outer Segment Morphogenesis and Visual Function in Zebrafish
Source: PubMed Central journal article supplement (PMC5701214; doi:10.1038/s41598-017-16498-9), 2017-11-24

## **Supplementary Information**

### **The Retinol Binding Protein Receptor 2 (Rbpr2) is required for Photoreceptor Outer Segment Morphogenesis and Visual Function in Zebrafish**

**Authors:** Yi Shi<sup>1,2</sup>, Elisabeth Obert<sup>3</sup>, Bushra Rahman<sup>1</sup>, Bärbel Rohrer<sup>3,4</sup> and Glenn P. Lobo<sup>1,3\*</sup>

**Affiliations:** <sup>1</sup>Department of Medicine, Medical University of South Carolina, Charleston, SC, 29425, USA. <sup>2</sup>Tianjin Medical University Eye Hospital, Tianjin, 300384, China. <sup>3</sup>Department of Ophthalmology, Medical University of South Carolina, Charleston, SC, 29425, USA. <sup>4</sup>Ralph H. Johnson VA Medical Center, Division of Research, Charleston, SC 2940, USA.

#### **\*Corresponding Author**

Glenn P. Lobo, Ph.D.

Email: [lobo@musc.edu](mailto:lobo@musc.edu)

## Supplementary Information

### Supplementary Figure S1: Rbpr2 mRNA expression patterns in staged zebrafish larvae

(A) Rbpr2 expression patterns were determined in staged zebrafish larvae by semi-quantitative RT-PCR. Total RNA from zebrafish larvae (1 - 5.5 dpf.) were subjected to semi-quantitative RT-PCR using zebrafish *rbpr2*, *stra6* and *gapdh* gene specific primers. Amplified PCR products were electrophoresed on 2 % agarose gels, alongside a low-molecular weight DNA ladder. Zebrafish *rbpR2* mRNA was observed as being expressed from early to late larvae stages. A portion of Zebrafish *stra6* was amplified and used as positive control. A portion of zebrafish *gapdh* was also amplified at same developmental time points and this served as the endogenous loading control.

### Supplementary Figure S2: Eye sections of zebrafish at 5 dpf from rescue experiments

Histological analysis of *rbpr2*<sup>musc97</sup> mutant larvae eyes after rescue experiments at 5 dpf showed normal retinal lamination and eye patterning which were comparable to WT animals.

### Supplementary Figure S3: ZIRC *rbpr2* mutants (*rbpr2*<sup>sa10706</sup>) show eye phenotypes consistent with retinol deficiency

A *rbpr2* mutant zebrafish line (G>A mutation; *rbpr2*<sup>sa10706</sup>) from the Zebrafish International Resource Center (ZIRC) which affects the essential splice site of exon

5/intron 6, was obtained and analyzed by light microscopy, histology and immunohistochemistry for cones at 5.5 dpf. The resulting eye phenotype observed was similar to the TALEN generated *rbpr2* mutant phenotype (*rbpr2<sup>musc97</sup>*) described. *Rbpr2<sup>sa10706</sup>* mutants showed gross defects, which included: \*hydrocephaly; \*\*smaller eyes, \*\*\*pericardial edema and \*\*\*\*slight tail curvature.

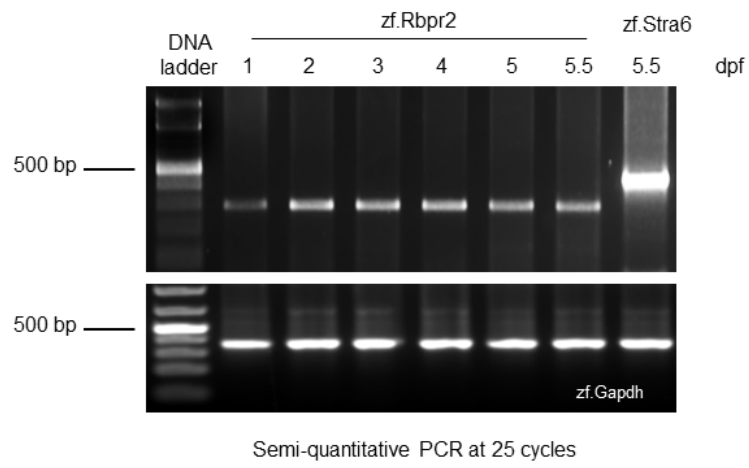

**Supplementary Figure 1**

*rbpr2<sup>musc97</sup> mut* + 150 ng mRNA

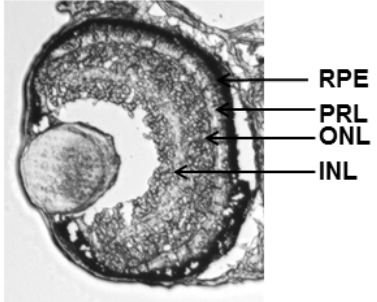

*rbpr2<sup>musc97</sup> mut* + 0.2  $\mu$ M ATRA

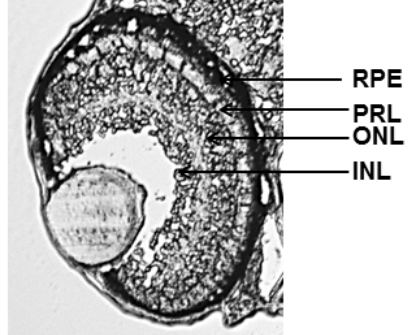

*rbpr2<sup>musc97</sup> mut* + 250 ng mRNA

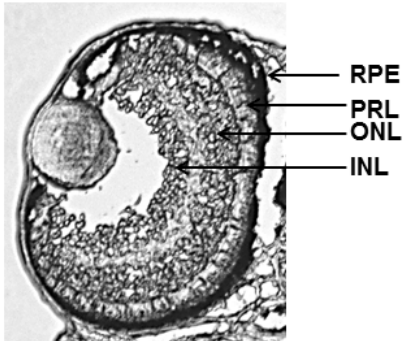

*rbpr2<sup>musc97</sup> mut* + 0.5  $\mu$ M ATRA

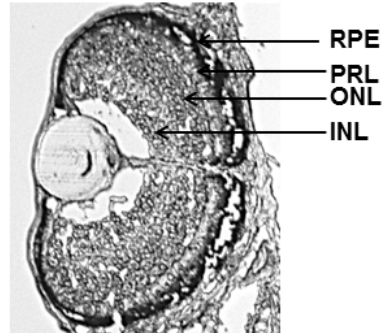

**Supplementary Figure 2**

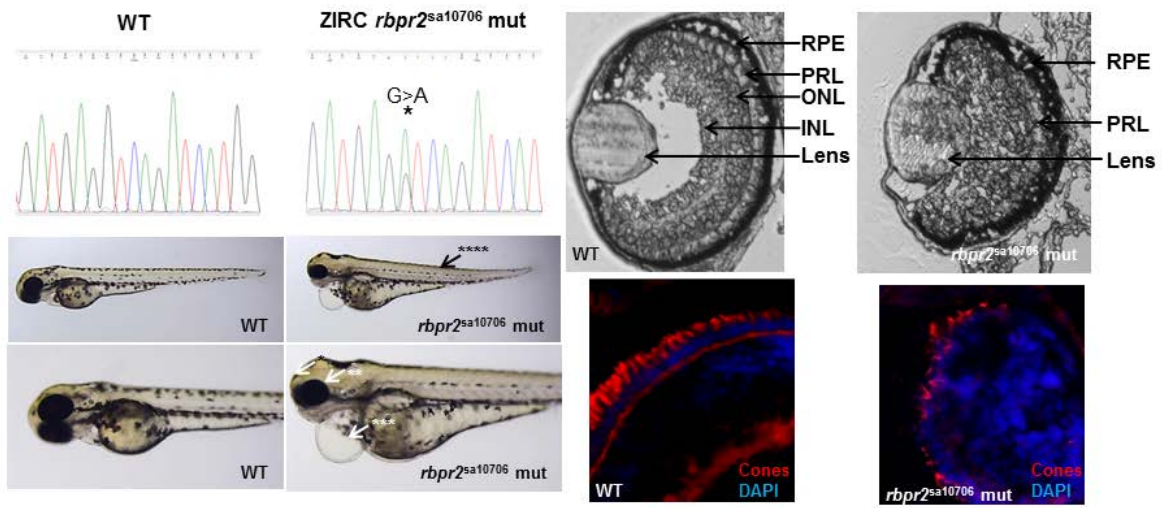

Supplementary Figure 3

Full image of unedited gel showing expression of V5-tagged Rbpr2- (V5 antibody) and LRAT in stable cell lines: Supporting Figure 1A

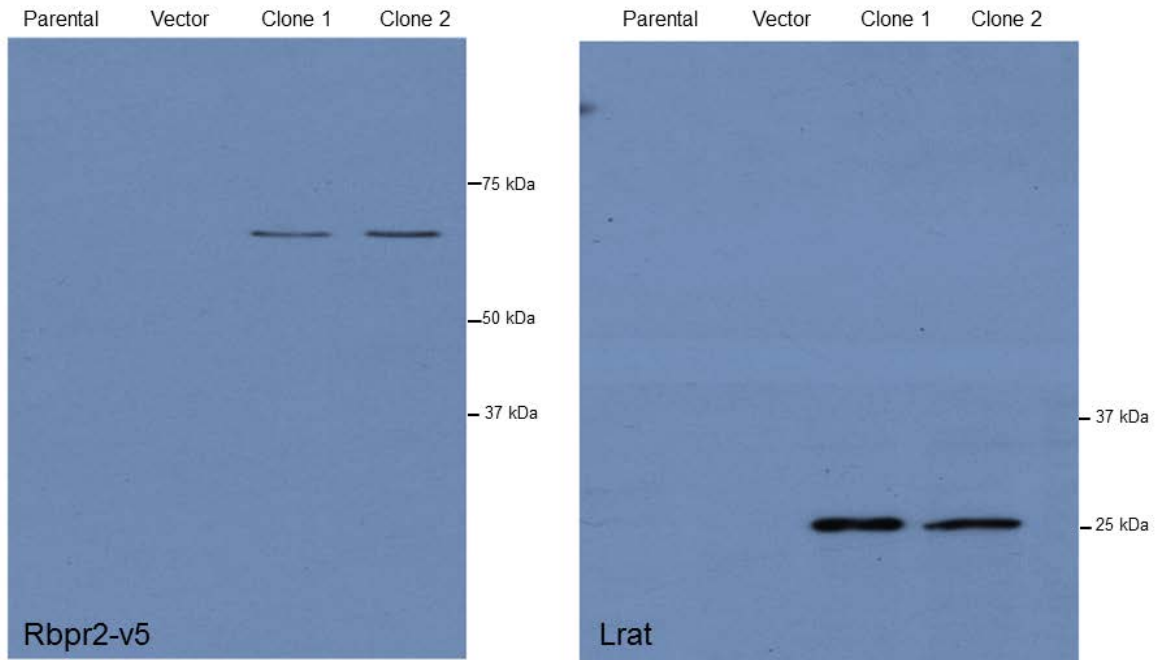

Full image of unedited gel showing expression of  $\beta$ -actin in stable cell lines: Supporting Figure 1A

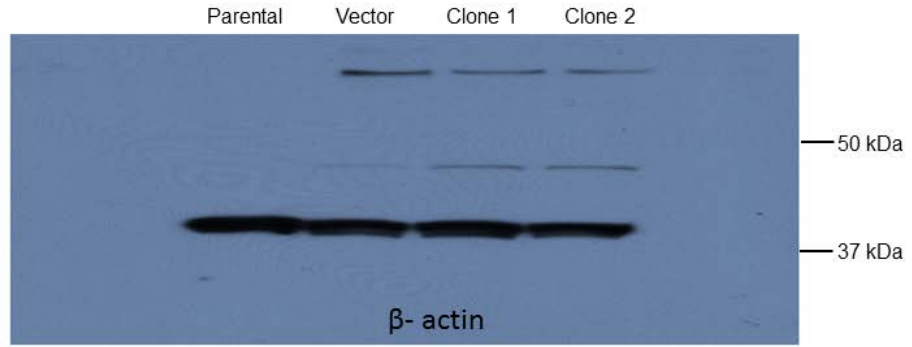



Full image of SDS-PAGE gel and Commassie Blue staining showing expression of purified RBP4 protein: Supporting Figure 1D

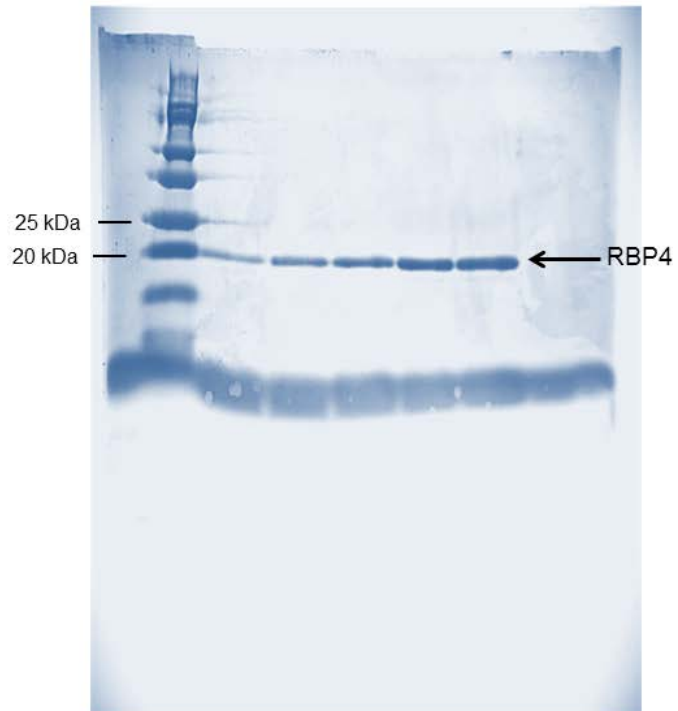

Supplement: 41598_2017_16498_MOESM1_ESM.pdf [file 41598_2017_16498_MOESM1_ESM.pdf]
